# Supplementary material for: Optimizing Operating Parameters of High-Temperature Steam for Disinfecting Total Nematodes and Bacteria in Soil: Application of the Box–Behnken Design
Source: MDPI journal article supplement (doi:10.3390/ijerph17145029), 2020-07-13
Supplement: s1 [file s1]

## Supplementary Material

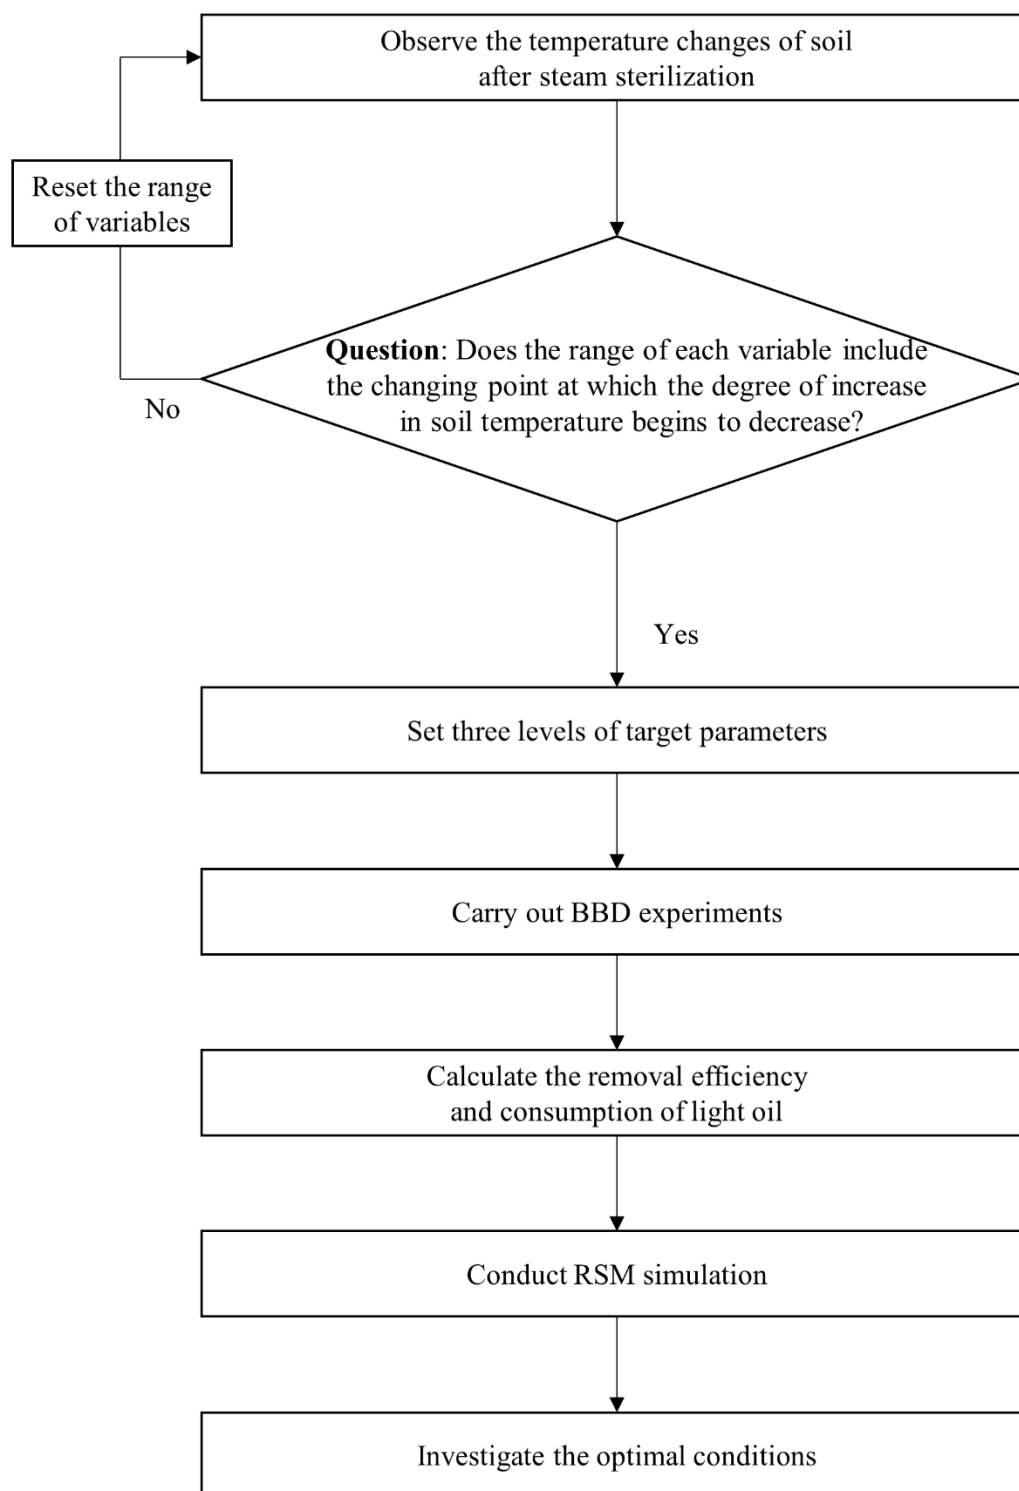

**Figure S1.** Flow chart of the optimization design.
